# Supplementary material for: Single molecule force spectroscopy reveals the temperature-dependent robustness and malleability of a hyperthermophilic protein
Source: Royal Society of Chemistry journal article supplement (doi:10.1039/c3sm51439k), 2013-01-01
Supplement: c3sm51439k.pdf [file c3sm51439k.pdf]

## SUPPLEMENTARY INFORMATION

### **Single Molecule Force Spectroscopy Reveals the Temperature-dependent Robustness and Malleability of a Hyperthermophilic Protein**

**Katarzyna M. Tych<sup>a,b</sup>, Toni Hoffmann<sup>a,b</sup>, David J. Brockwell<sup>b</sup> and Lorna Dougan<sup>a,b\*</sup>**

<sup>a</sup> School of Physics and Astronomy, University of Leeds, Leeds LS2 9JT, United Kingdom.

<sup>b</sup> Astbury Centre for Structural Molecular Biology, University of Leeds, Leeds LS2 9JT, United Kingdom.

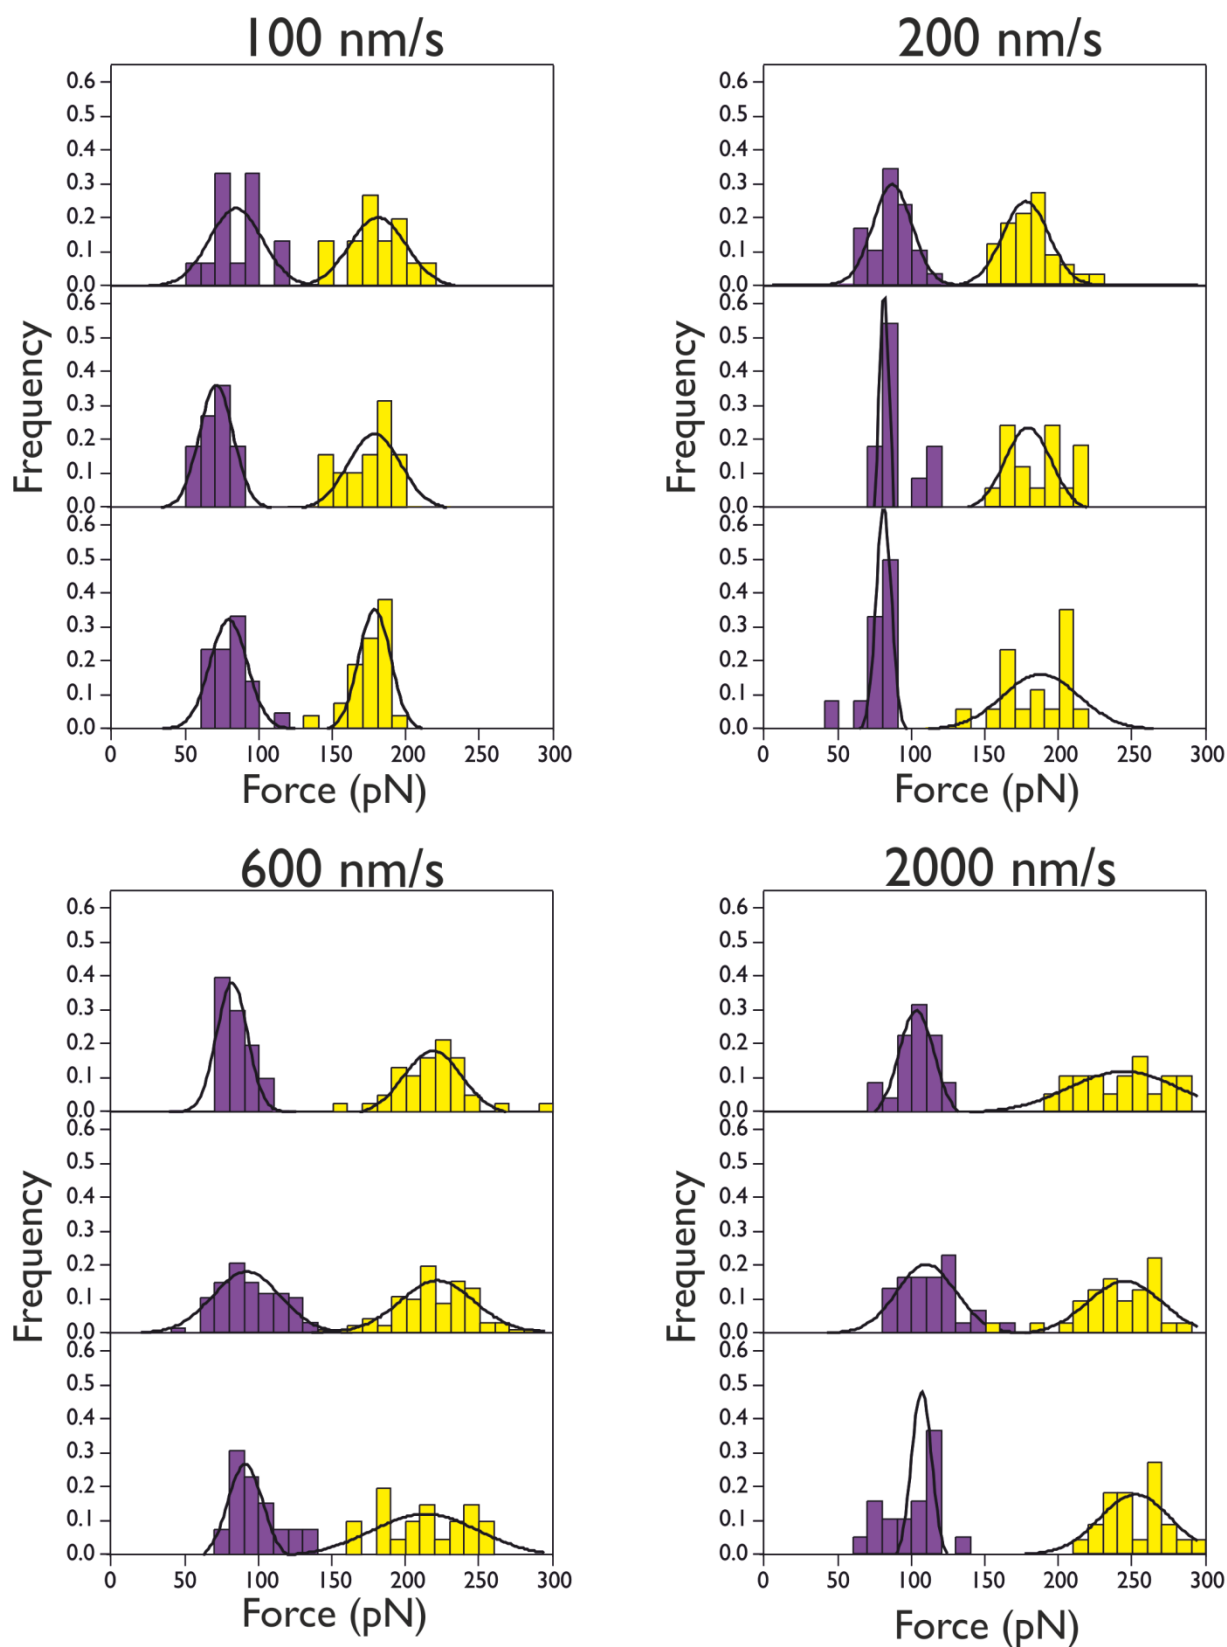

**Figure S1:** The unfolding force histograms for each experiment conducted at 5°C, showing the histograms for CSP events in purple and those for I27 in yellow, grouped by pulling velocity. Gaussian fits to the data provide a measure of the force distribution widths.

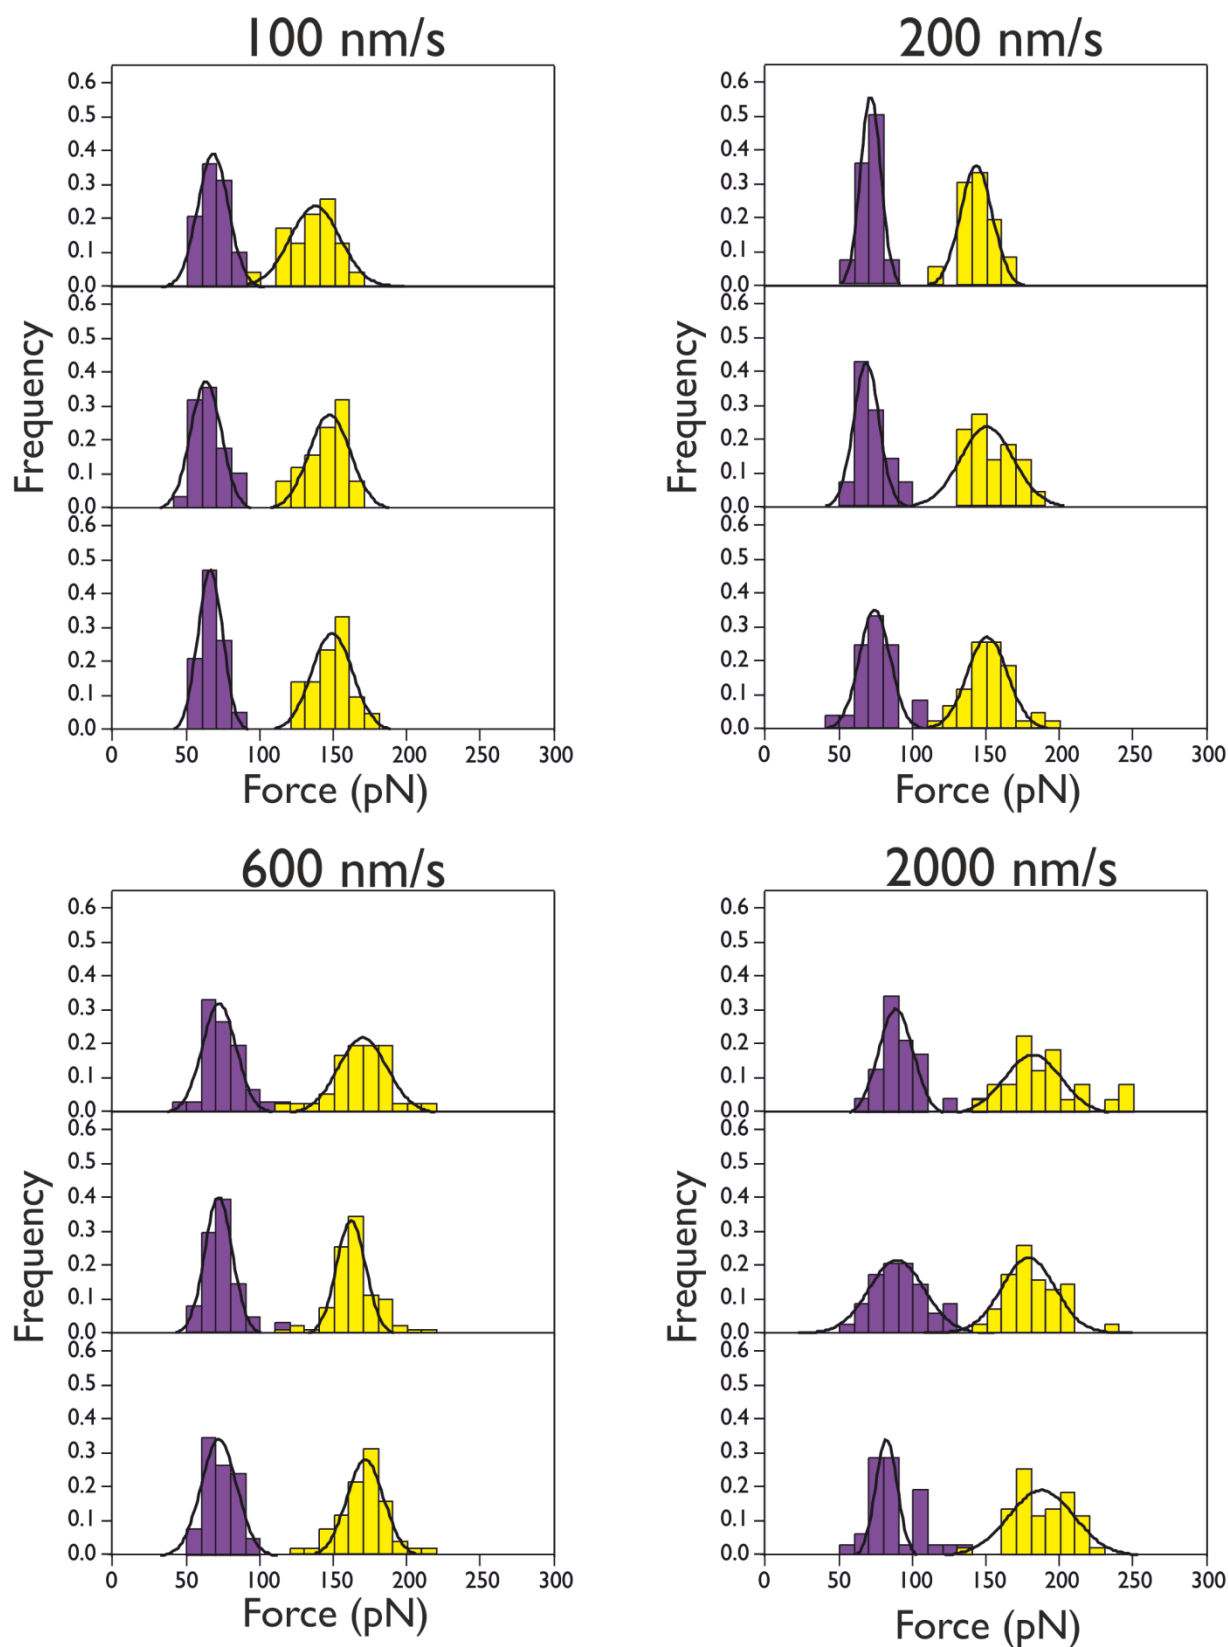

**Figure S2:** The unfolding force histograms for each experiment conducted at 23°C, showing the histograms for CSP events in purple and those for I27 in yellow, grouped by pulling velocity. Gaussian fits to the data provide a measure of the force distribution widths.

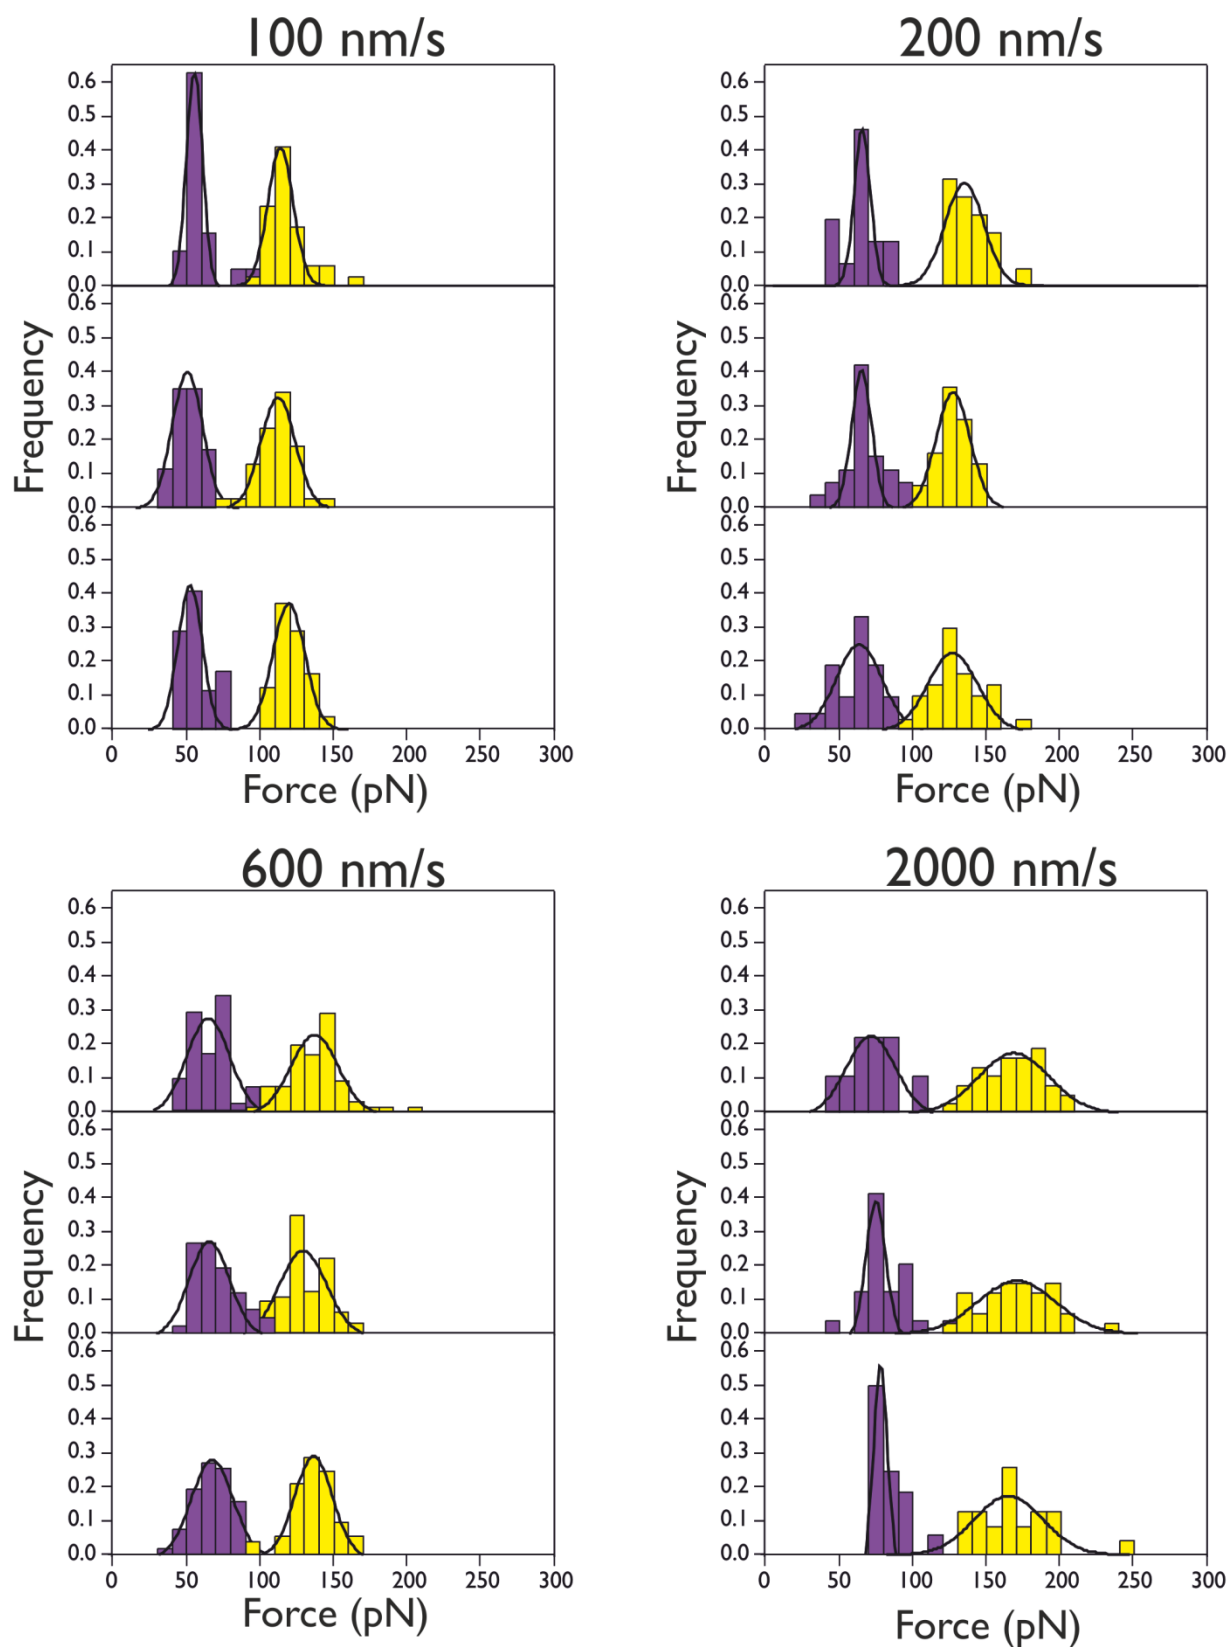

**Figure S3:** The unfolding force histograms for each experiment conducted at 40°C, showing the histograms for CSP events in purple and those for I27 in yellow, grouped by pulling velocity. Gaussian fits to the data provide a measure of the force distribution widths.

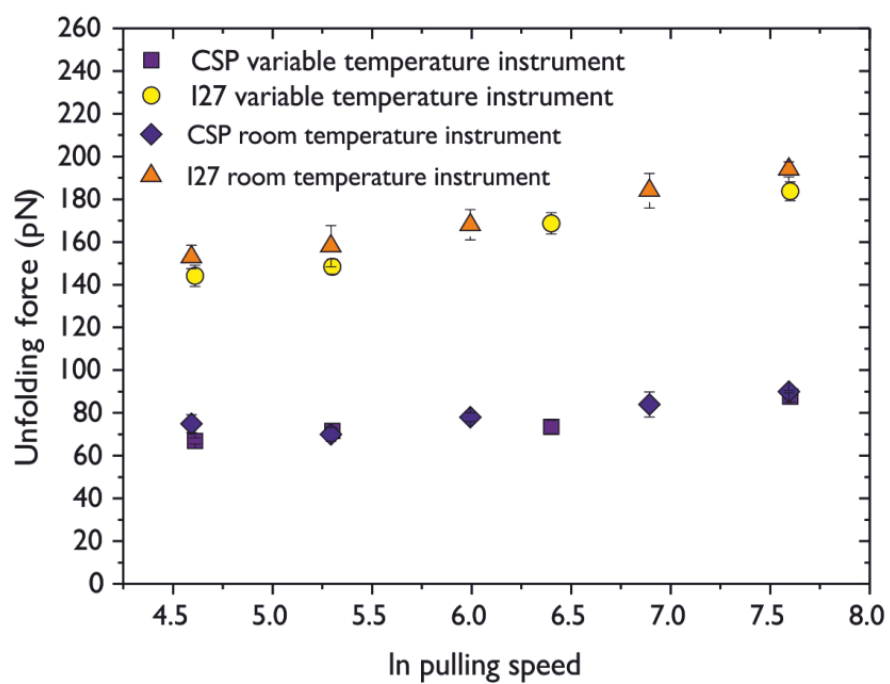

**Figure S4:** Comparison of the pulling speed dependence of the unfolding forces of I27 and CSP on the variable temperature instrument at 23°C used in this work and the room temperature instrument used to characterise the same sample under the same conditions, as previously reported in *Journal of Physical Chemistry, B*, 2013, **117**, 1819-1826.

| Speed<br>[nms <sup>-1</sup> ] | # Csp | # I27 | Median unfolding force<br>CSP [pN] (±SD) | Average<br>[pN]<br>(±SD) | Median unfolding force<br>I27 [pN] (±SD) | Average<br>[pN]<br>(±SD) |
|-------------------------------|-------|-------|------------------------------------------|--------------------------|------------------------------------------|--------------------------|
| 100                           | 15    | 15    | 85 (± 16)                                | 80 (± 5)                 | 172 (± 19)                               | 176 (± 3)                |
|                               | 11    | 19    | 74 (± 10)                                |                          | 179 (± 17)                               |                          |
|                               | 21    | 26    | 80 (± 12)                                |                          | 177 (± 13)                               |                          |
| 200                           | 27    | 31    | 88 (± 13)                                | 86 (± 4)                 | 182 (± 17)                               | 183 (± 3)                |
|                               | 12    | 16    | 87 (± 14)                                |                          | 186 (± 20)                               |                          |
|                               | 12    | 17    | 80 (± 11)                                |                          | 184 (± 22)                               |                          |
| 600                           | 10    | 37    | 85 (± 10)                                | 91 (± 6)                 | 218 (± 29)                               | 216 (± 4)                |
|                               | 13    | 20    | 95 (± 17)                                |                          | 212 (± 29)                               |                          |
|                               | 67    | 90    | 93 (± 20)                                |                          | 218 (± 28)                               |                          |
| 2000                          | 30    | 32    | 114 (± 19)                               | 107 (± 6)                | 243 (± 29)                               | 248 (± 5)                |
|                               | 19    | 20    | 102 (± 19)                               |                          | 253 (± 23)                               |                          |
|                               | 20    | 18    | 107 (± 26)                               |                          | 247 (± 28)                               |                          |

Table S1. Summary of mechanical unfolding data for (I27-Csp)<sub>3</sub>-I27 at 5°C

| Speed<br>[nms <sup>-1</sup> ] | # Csp | # I27 | Median unfolding force<br>CSP [pN] (±SD) | Average<br>[pN]<br>(±SD) | Median unfolding force<br>I27 [pN] (±SD) | Average<br>[pN]<br>(±SD) |
|-------------------------------|-------|-------|------------------------------------------|--------------------------|------------------------------------------|--------------------------|
| 100                           | 19    | 52    | 68 (± 8)                                 | 67 (± 2)                 | 139 (± 17)                               | 144 (± 5)                |
|                               | 28    | 25    | 66 (± 11)                                |                          | 147 (± 13)                               |                          |
|                               | 19    | 21    | 66 (± 7)                                 |                          | 147 (± 13)                               |                          |
| 200                           | 14    | 36    | 72 (± 7)                                 | 72 (± 2)                 | 144 (± 11)                               | 149 (± 4)                |
|                               | 14    | 22    | 70 (± 9)                                 |                          | 151 (± 14)                               |                          |
|                               | 24    | 43    | 73 (± 12)                                |                          | 151 (± 16)                               |                          |
| 600                           | 31    | 35    | 77 (± 15)                                | 73 (± 3)                 | 170 (± 21)                               | 169 (± 5)                |
|                               | 61    | 78    | 72 (± 12)                                |                          | 163 (± 15)                               |                          |
|                               | 37    | 51    | 72 (± 10)                                |                          | 173 (± 16)                               |                          |
| 2000                          | 23    | 48    | 88 (± 16)                                | 88 (± 3)                 | 184 (± 26)                               | 184 (± 4)                |
|                               | 34    | 69    | 90 (± 17)                                |                          | 179 (± 18)                               |                          |
|                               | 31    | 43    | 85 (± 17)                                |                          | 188 (± 17)                               |                          |

Table S2. Summary of mechanical unfolding data for (I27-Csp)<sub>3</sub>-I27 at 23°C

| Speed<br>[nms <sup>-1</sup> ] | # Csp | # I27 | Median unfolding force<br>CSP [pN] (±SD) | Average<br>[pN]<br>(±SD) | Median unfolding force<br>I27 [pN] (±SD) | Average<br>[pN]<br>(±SD) |
|-------------------------------|-------|-------|------------------------------------------|--------------------------|------------------------------------------|--------------------------|
| 100                           | 19    | 34    | 53 (± 13)                                | 54 (± 1)                 | 114 (± 14)                               | 115 (± 5)                |
|                               | 17    | 38    | 54 (± 9)                                 |                          | 111 (± 13)                               |                          |
|                               | 17    | 24    | 54 (± 13)                                |                          | 120 (± 10)                               |                          |
| 200                           | 15    | 19    | 64 (± 12)                                | 65 (± 2)                 | 137 (± 14)                               | 131 (± 5)                |
|                               | 26    | 31    | 66 (± 11)                                |                          | 127 (± 11)                               |                          |
|                               | 20    | 30    | 64 (± 16)                                |                          | 130 (± 17)                               |                          |
| 600                           | 41    | 65    | 67 (± 14)                                | 67 (± 1)                 | 138 (± 19)                               | 134 (± 5)                |
|                               | 41    | 63    | 66 (± 14)                                |                          | 128 (± 14)                               |                          |
|                               | 20    | 52    | 68 (± 12)                                |                          | 137 (± 14)                               |                          |
| 2000                          | 18    | 37    | 72 (± 16)                                | 77 (± 5)                 | 168 (± 20)                               | 168 (± 2)                |
|                               | 24    | 33    | 79 (± 15)                                |                          | 170 (± 24)                               |                          |
|                               | 16    | 23    | 80 (± 12)                                |                          | 167 (± 25)                               |                          |

Table S3. Summary of mechanical unfolding data for (I27-Csp)<sub>3</sub>-I27 at 40°C
